# Supplementary material for: Hybridization Capture Using Short PCR Products Enriches Small Genomes by Capturing Flanking Sequences (CapFlank)
Source: PubMed Central journal article supplement (PMC4183570; doi:10.1371/journal.pone.0109101), 2014-10-02
Supplement: pone.0109101.s002.pdf [file pone.0109101.s002.pdf]

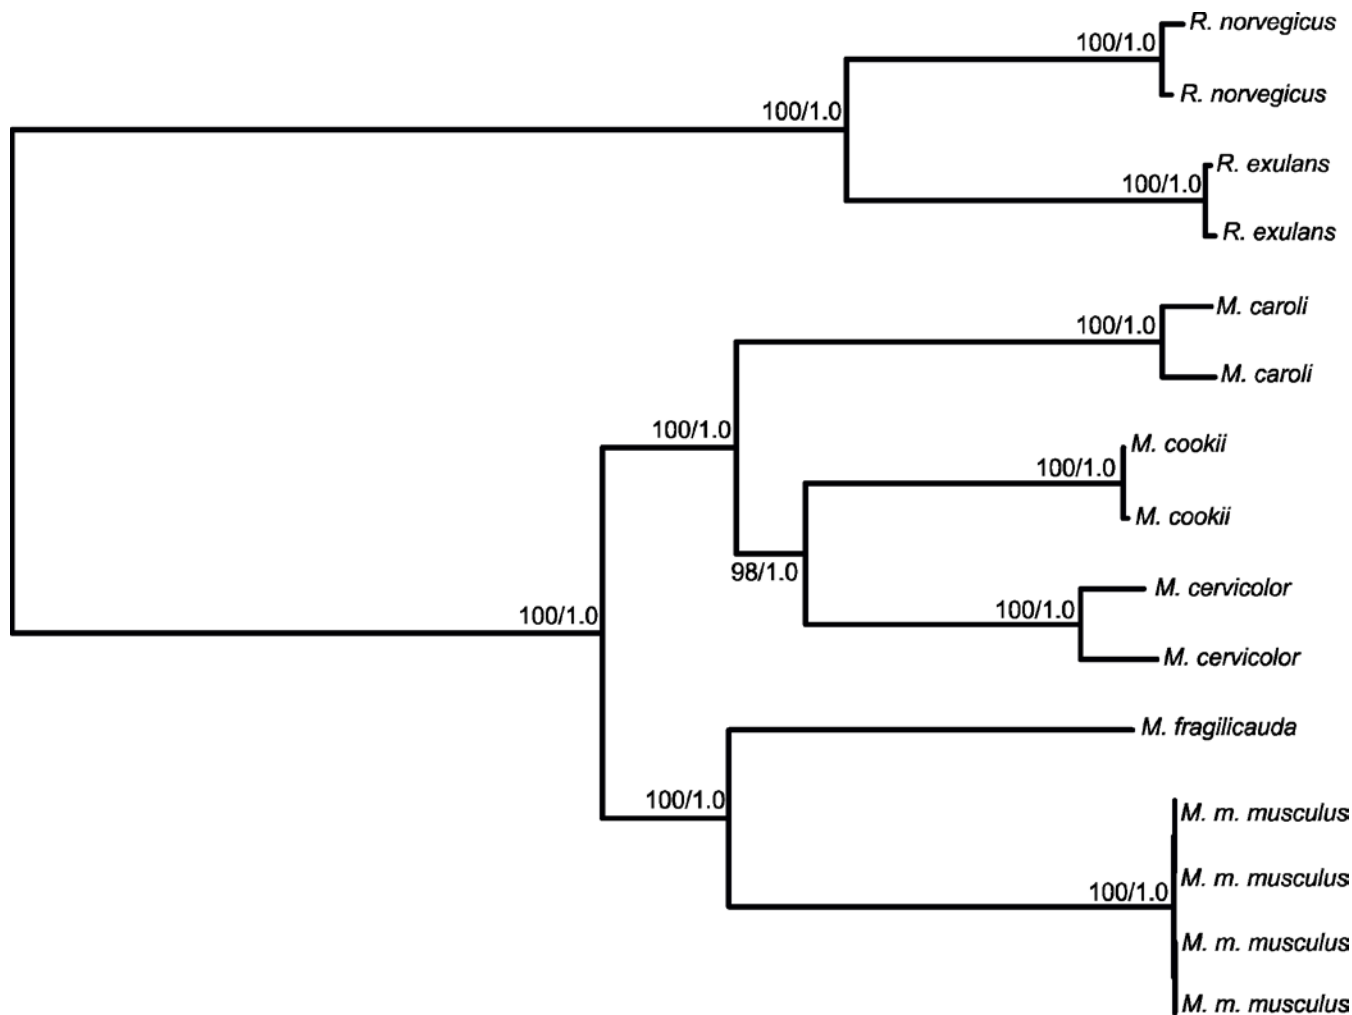

**Figure S2. CapFlank used to capture four novel full mitochondrial genomes from Southeast Asian mice.** The mixed rodent control region bait described in Fig. 1 was used to enrich libraries generated from *Mus caroli*, *Mus cervicolor*, *Mus cookii*, and *Mus fragilicauda*. Full mitochondrial genomes were obtained from each sample (Supplemental Table S3). Phylogenetic analyses summarized the relationships among the studied species. They demonstrated the close relationships among *M. cervicolor* and *M. cookii*, themselves sister species of *M. caroli*. The species *M. fragilicauda* appears more close to *M. musculus*. The numbers given at each node correspond to the bootstrap values and the Posterior Probabilities obtained with raxmlGUI and Mr Bayes, respectively.
