# Supplementary material for: Hybridization Capture Using Short PCR Products Enriches Small Genomes by Capturing Flanking Sequences (CapFlank)
Source: PubMed Central journal article supplement (PMC4183570; doi:10.1371/journal.pone.0109101), 2014-10-02
Supplement: pone.0109101.s003.pdf [file pone.0109101.s003.pdf]

**Table S1** | Sample information

| <b>Species</b>                | <b>common name</b>  | <b>Sample number</b>                                                                                |
|-------------------------------|---------------------|-----------------------------------------------------------------------------------------------------|
| <i>Phascolarctos cinereus</i> | koala               | Pci-SN265<br>Pci-QMJ6480<br>Pci-582119<br>Pci-MCZ8574<br>Pci-MCZ12454<br>Pci-um3435<br>Pci-maex1738 |
| <i>Rattus norvegicus</i>      | Norway rat          | C0317                                                                                               |
| <i>Rattus exulans</i>         | polynesian rat      | R4824                                                                                               |
| <i>Mus cookii</i>             | Cook's mouse        | R5155, R5482                                                                                        |
| <i>Mus cervicolor</i>         | fawn-colored mouse  | R4864, R5630                                                                                        |
| <i>Mus fragilicauda</i>       | sheath-tailed mouse | R5125                                                                                               |
| <i>Mus caroli</i>             | Ryukyu mouse        | C0423, R5231                                                                                        |
| <i>E. coli</i>                | strain 536          | NA                                                                                                  |
| <i>Phytophthora infestans</i> | Potato blight       | RS2009P1                                                                                            |
| <i>Architeuthis dux</i>       | Giant squid         | GS MTV Z9261                                                                                        |
| <i>Columba livia</i>          | Pigeon              | GUI 14                                                                                              |
| <i>Vitis vinifera</i>         | Grape               | Hatis-1                                                                                             |

| <b>Collection source</b>                             | <b>Date collected</b> | <b>Tissue type</b> |
|------------------------------------------------------|-----------------------|--------------------|
| Schönbrunn Zoo Vienna                                | 2012                  | Whole blood        |
| Queensland Museum                                    | 1938                  | Skin               |
| Stockholm Museum                                     | 1911                  | Skin               |
| Museum of Comparative Zoology                        | 1904                  | Skin               |
| Museum of Comparative Zoology                        | 1904                  | Skin               |
| Bohusläns Museum                                     | 1891                  | Skin               |
| Goteborg Museum                                      | 1870-1891             | Skin               |
| CERoPath, Institut des Sciences de l'Evolution, CNRS | 2008                  | Whole blood        |
| CERoPath, Institut des Sciences de l'Evolution, CNRS | 2008                  | Whole blood        |
| CERoPath, Institut des Sciences de l'Evolution, CNRS | 2008                  | Whole blood        |
| CERoPath, Institut des Sciences de l'Evolution, CNRS | 2008                  | Whole blood        |
| CERoPath, Institut des Sciences de l'Evolution, CNRS | 2008                  | Whole blood        |
| CERoPath, Institut des Sciences de l'Evolution, CNRS | 2008                  | Whole blood        |
| CERoPath, Institut des Sciences de l'Evolution, CNRS | 2008                  | Human urine        |
| Pennsylvania, USA                                    | 2009                  | Mycelium           |
| Tasman Sea, near New Zealand                         | 1998                  | Tentacle           |
| Guimaraes, Portugal                                  | 2011                  | Muscle             |
| Abovyan, Armenia                                     | 2011                  | Leaf               |
