# Supplementary material for: Hybridization Capture Using Short PCR Products Enriches Small Genomes by Capturing Flanking Sequences (CapFlank)
Source: PubMed Central journal article supplement (PMC4183570; doi:10.1371/journal.pone.0109101), 2014-10-02
Supplement: pone.0109101.s004.pdf [file pone.0109101.s004.pdf]

**Table S2** | CapFlank Coverage Data For Southeast Asian Rodents

---

| <b>Sample</b>            | <b>Genome size</b> | <b>Total bait size*</b> | <b>bait fold coverage</b> | <b>flank fold coverage</b> | <b>% genome with no coverage</b> |
|--------------------------|--------------------|-------------------------|---------------------------|----------------------------|----------------------------------|
|                          | 16 Kb              | 1040                    |                           |                            |                                  |
| <i>Mus cookii</i>        |                    |                         |                           |                            |                                  |
| R5482                    |                    |                         | 3984                      | 1725                       | 0%                               |
| R5155                    |                    |                         | 2792                      | 371                        | 0,01%                            |
| <i>Mus cervicolor</i>    |                    |                         |                           |                            |                                  |
| R4864                    |                    |                         | 1290                      | 402                        | 0%                               |
| R5640                    |                    |                         | 2032                      | 2346                       | 0%                               |
| <i>Mus caroli</i>        |                    |                         |                           |                            |                                  |
| R5231                    |                    |                         | 2399                      | 500                        | 0%                               |
| <i>Rattus norvegicus</i> |                    |                         |                           |                            |                                  |
| C0317                    |                    |                         | 239                       | 38                         | 0%                               |

---
