# Supplementary material for: Hybridization Capture Using Short PCR Products Enriches Small Genomes by Capturing Flanking Sequences (CapFlank)
Source: PubMed Central journal article supplement (PMC4183570; doi:10.1371/journal.pone.0109101), 2014-10-02
Supplement: pone.0109101.s005.pdf [file pone.0109101.s005.pdf]

**Table S3|** Primers used in this study

|                                                 | Forward Primer                              | Primer Sequence                   | Reverse Primer              | Primer Sequence                    |
|-------------------------------------------------|---------------------------------------------|-----------------------------------|-----------------------------|------------------------------------|
| <b>Amplicon primers</b>                         |                                             |                                   |                             |                                    |
| Potato blight ( <i>Phytophthora infestans</i> ) | RXLR effector_Fa                            | 5'-ACCGATTTCTGCGTCGGGATGA-3'      | RXLR effector_Ra            | 5'-ACCCCATCCGCGTGCCAAC-3'          |
| Giant squid ( <i>Architeuthis dux</i> )         | mtDNA ND4_Fa                                | 5'-GCCTCTACATGAGCCTTAGGAGCCA-3'   | mtDNA ND4_Ra                | 5'-CGGAGCGTTTACAAGCGGGGA-3'        |
| Pigeon ( <i>Columba livia</i> )                 | mtDNA COL_Fa                                | 5'-TCGTACAGCCCATGCCTTCG-3'        | mtDNA COL_Ra                | 5'-CCGGCGTGAGCTAGGTTGCC-3'         |
| Grape ( <i>Vitis vinifera</i> )                 | rbcl (ribulose-bisphosphate carboxylase)_Fa | 5'-AGAAGCAGGGGCCGCGTAG-3'         | rbcl_Ra                     | 5'-ACGTAGAGCGCGCAGAGCTT-3'         |
| <b>Bait primers</b>                             |                                             |                                   |                             |                                    |
| Potato blight ( <i>Phytophthora infestans</i> ) | RXLR_F                                      | 5'-AGTGGCGGGCGACATACCCC-3'        | RXLR_R                      | 5'-TTCCAGCAACTCGTCGGCCA-3'         |
| Pigeon ( <i>Columba livia</i> )                 | mtDNA COL_F                                 | 5'-TTGGTGCCCCCGACATAGCA-3'        | mtDNA COL_R                 | 5'-GCTTCGACTGTGGAGAGGCT-3'         |
| Escherichia coli                                | Thr_synthase_F1                             | 5'-TGCGCAAGCCGTAACCCAGG-3'        | Thr_synthase_R1             | 5'-CACGCGGCCAGTTGTTGGC-3'          |
|                                                 | ssu_C_F1                                    | 5'-CCAGGGGGCAACGCGCAATA-3'        | ssu_C_R1                    | 5'-GGCGACGGCGGTCTCCTTGA-3'         |
|                                                 | polyk_synthase_F1                           | 5'-CCGGCGTTGCGCGAGAGTAT-3'        | polyk_synthase_R1           | 5'-GTTGCGTTGGCAGGTGGGGT-3'         |
|                                                 | tas_F1                                      | 5'-CCTGCGGTTTCGCTGCTGGA-3'        | tas_R1                      | 5'-TGCTGATTGGCGTGCTGGGG-3'         |
|                                                 | xanthine/uracil permease_F1                 | 5'-TAACGCGCGCCAGGCTTGAA-3'        | xanthine/uracil permease_R1 | 5'-TGGCACTGGCTCCGGCAATG-3'         |
| Rodent mtDNA control region                     | Rodent CR_Fb                                | 5'-ATAAACATTACTCTGGTCTTGTAAACC-3' | Rodent CR_R*                | 5'-ATTAAATTAAAGCCAGGACCAAACT-3'    |
| Koala Retrovirus                                | PCI-KoRV-F1                                 | 5'-AGGAGGCAGAAATCATGAGG-3'        | PCI-KoRV-R1                 | 5'-AGAAACCCTCCAGGATCAA-3'          |
|                                                 | PCI-KoRV-F2                                 | 5'-TCGTAAGTTCAATAAACCTCTTGC-3'    | PCI-KoRV-R2                 | 5'-ACGTATATTA AAAAGACAGGAAAAAGA-3' |
|                                                 | PCI-KoRV-F3                                 | 5'-GAGATTCACCCCAAGGAC-3'          | PCI-KoRV-R3                 | 5'-CAGTGATCTAGTGAAGAGAGAGAGG-3'    |
|                                                 | PCI-KoRV-F4                                 | 5'-CCTGTCTTTTTAATATACGTCTACGC-3'  | PCI-KoRV-R4                 | 5'-CGACTTTCGCCGTTATC-3'            |
|                                                 | PCI-KoRV-F5                                 | 5'-GGGTGAGTCGACCCCTCT-3'          | PCI-KoRV-R5                 | 5'-GAGTCCCTCAGCCATTAGGC-3'         |
|                                                 | PCI-KoRV-F6                                 | 5'-AAGATCGCCGTTGCCTCT-3'          | PCI-KoRV-R6                 | 5'-AGGAGCTGCTGGCAATCG-3'           |
|                                                 | PCI-KoRV-F7                                 | 5'-ATCCAAAGTCCCTCCAC-3'           | PCI-KoRV-R7                 | 5'-GATCCCACTGAGGTCGATT-3'          |
|                                                 | PCI-KoRV-F8                                 | 5'-TTTTCCACCAGCCTACTTG-3'         | PCI-KoRV-R8                 | 5'-AGATCCTCGAAGGAATGGTC-3'         |
|                                                 | PCI-KoRV-F9                                 | 5'-GCCCTACACAACCTAGGAA-3'         | PCI-KoRV-R9                 | 5'-TTTCTGCTGGCGCTGTG-3'            |
|                                                 | PCI-KoRV-F10                                | 5'-TTACAAAGGCTGGAAGACTC-3'        | PCI-KoRV-R10                | 5'-GCTTGGTCAATACTGAATGTTTCG-3'     |
|                                                 | PCI-KoRV-F11                                | 5'-GAGACAGAGGAAGAGAGAGACG-3'      | PCI-KoRV-R11                | 5'-AAGAATGAGTGGGTCACTTGC-3'        |
|                                                 | PCI-KoRV-F12                                | 5'-CTGAGTTTTTGGTTGATACCG-3'       | PCI-KoRV-R12                | 5'-TTGCTCATTGGGTACTGTGC-3'         |
|                                                 | PCI-KoRV-F13                                | 5'-CAAGAGACTTTTAAAAATGGACA-3'     | PCI-KoRV-R13                | 5'-CGATAGTCATTGGTTCCAGTG-3'        |
|                                                 | PCI-KoRV-F14                                | 5'-TGAAGTCAGATGCCCTACCA-3'        | PCI-KoRV-R14                | 5'-GTTGAGAGCCCTGAAGGATG-3'         |
|                                                 | PCI-KoRV-F15                                | 5'-CCTGGAACACCCTTTGTTA-3'         | PCI-KoRV-R15                | 5'-TTGGCCGACACTCGGTAT-3'           |
|                                                 | PCI-KoRV-F16                                | 5'-ACTCTCCACCCTCTTCGAT-3'         | PCI-KoRV-R16                | 5'-GCCCTTTTATACGGCCAAA-3'          |
|                                                 | PCI-KoRV-F17                                | 5'-GGGACACGAAGGCTCTTACA-3'        | PCI-KoRV-R17                | 5'-GGCCACCAGGATCTAATTTTT-3'        |
|                                                 | PCI-KoRV-F18                                | 5'-TCCCTTTACCTGGACTGAGG-3'        | PCI-KoRV-R18                | 5'-ATTGGGGTGTGCTGACTC-3'           |
|                                                 | PCI-KoRV-F19                                | 5'-CCCGGTAGCTTACCTGTCAA-3'        | PCI-KoRV-R19                | 5'-GTTCCCTCTGGCAGGTTG-3'           |
|                                                 | PCI-KoRV-F20                                | 5'-CGGCCATTCTGAATCCTG-3'          | PCI-KoRV-R20                | 5'-CGGGGCAATGGATGATAG-3'           |
|                                                 | PCI-KoRV-F21                                | 5'-GCCATTGTGGACAACAGC-3'          | PCI-KoRV-R21                | 5'-GATGCAGCCGTTGAATGAAT-3'         |
|                                                 | PCI-KoRV-F22                                | 5'-TGCTAGAGGCCATCCATCTC-3'        | PCI-KoRV-R22                | 5'-GCTTGTCTGGCCCTAAGTG-3'          |
|                                                 | PCI-KoRV-F23                                | 5'-CTACACGGGGGAAGATCAAG-3'        | PCI-KoRV-R23                | 5'-TGTCGGACCCGAGTACCTTA-3'         |
|                                                 | PCI-KoRV-F24                                | 5'-GAGAGAGCTCACCCCTGACC-3'        | PCI-KoRV-R24                | 5'-CCAATCAATCCCCAGTTGAG-3'         |
|                                                 | PCI-KoRV-F25                                | 5'-ACTCGGGTCCGACAATGG-3'          | PCI-KoRV-R25                | 5'-CTTCCACCAGGCTCAAG-3'            |
|                                                 | PCI-KoRV-F26                                | 5'-GGTCGGGGTGGTCACTAG-3'          | PCI-KoRV-R26                | 5'-GGTGGTCACTAGCACCAGGTA-3'        |
|                                                 | PCI-KoRV-F27                                | 5'-GTGCTGGTTAGAGCTATCG-3'         | KoRVes-R4.1*                | 5'-GGCCTGGCCTGTTGAGAG-3'           |
|                                                 | KoRVes-F1.1*                                | 5'-TGAAGGTTGACGGTATTGCT-3'        | KoRVes-R6.1*                | 5'-TCAAGTCCCGCACCTC-3'             |
|                                                 | KoRVes-F5.1*                                | 5'-CCGGAACCTACTGCATCG-3'          | KoRVes-R11.1*               | 5'-AGGATCGGRGCCACTAC-3'            |
|                                                 | KoRVes-F7.1*                                | 5'-GGTCCCAGTTCTACGTGTGC-3'        | KoRVes-R13.1*               | 5'-CGTGGTGGGAGATGGAGTA-3'          |
|                                                 | KoRVes-F12.1*                               | 5'-CAGTTGACCAYACGACTAGTGA-3'      | KoRVes-R17.1*               | 5'-GGGTATAGTCAGGTTGCAGAGA-3'       |
|                                                 | KoRVes-F14.1*                               | 5'-ATCCCCACGGTACAGGTA-3'          | KoRVes-R19.1*               | 5'-GGACAAGCTGGATCTGGATA-3'         |
|                                                 | KoRVes-F18.1*                               | 5'-CGGGTTATGTATAGGGAAAGTACC-3'    | KoRVes-R23.1*               | 5'-GCACTACTTCAGACAGGGAGGT-3'       |
|                                                 | KoRVes-F20.1*                               | 5'-TCTACATCAGTCTTCAACCAGTCT-3'    | KoRVes-R25.1*               | 5'-AACCTTTCTTGTGCTCCTCAT-3'        |
|                                                 | KoRVes-F24.1*                               | 5'-GGCCCTTCAAGACTCCATAA-3'        | KoRVes-R30.1*               | 5'-TCATTTCCCAATTTTCTTTG-3'         |
|                                                 | KoRVes-F26.1*                               | 5'-GGAATGCTGTTTCTATGTTGACC-3'     | PCI-KoRV-R28                | 5'-TTTGGCACTCCAAATCTCC-3'          |
|                                                 | PCI-KoRV-F29                                | 5'-CAGACCCTAGACAACGAGGA-3'        | PCI-KoRV-R29                | 5'-GAGACTCGGGCGACTCAG-3'           |
|                                                 | PCI-KoRV-F30                                | 5'-GTGCCCTCAGCAGTTTCTA-3'         | PCI-KoRV-R30                | 5'-TGAAGACCCCAATGTTCCG-3'          |
| koala mtDNA control region                      | PCI-CR-NF                                   | 5'-CATCAACACCCAAAGCTGAT-3'        | PCI-CR-NR                   | 5'-TTCTAGTACGTCGCCAATCT-3'         |

a Amplicon primers were also used for qPCR assays. b Primers were published in Riccardo et al. (2005) c Primers were published in Ávila-Arcos et al. (2012).
