# Supplementary material for: Hybridization Capture Using Short PCR Products Enriches Small Genomes by Capturing Flanking Sequences (CapFlank)
Source: PubMed Central journal article supplement (PMC4183570; doi:10.1371/journal.pone.0109101), 2014-10-02
Supplement: pone.0109101.s006.pdf [file pone.0109101.s006.pdf]

**Table S4| Shotgun sequencing versus hybridization capture enrichment for mtDNA flanking target region**

| <b>Sample</b>         | <b>Sequencing</b> | <b>Total reads</b> | <b>% reads matching bait flank</b> | <b>% reads not related to mtDNA flanking targeted region*</b> | <b>Flank fold coverage</b> |
|-----------------------|-------------------|--------------------|------------------------------------|---------------------------------------------------------------|----------------------------|
| <i>Rattus exulans</i> |                   |                    |                                    |                                                               |                            |
| R4824                 | capture           | 739801             | 16,20%                             | 83.8%                                                         | 432                        |
| R4824                 | shotgun           | 10755900           | 1.3%                               | 98,70%                                                        | 1016                       |

\* Mapping of sequences was to the *R. exulans* mtDNA genome excluding the bait region (control region) to specifically examine enrichment of bait flanking sequences in the shotgun sequences compared to those obtained by hybridization capture
